# Supplementary material for: Identification of a stem cell mediating osteoblast versus adipocyte lineage selection
Source: Research Square preprint supplement (doi:10.21203/rs.3.rs-198922/v1), 2023-01-26
Supplement: Supplementary file 1 [file 55f14ec575271cb69cfdd302.docx]

**Materials and Methods:**

**Animals:**

AZIP/F1 (*A-zip*) mice on a C57Bl6/J background were a gift from J. Friedman (Rockefeller University, New York, New York) 32,33. Pthrp-mCherry (*PTHrPmcherry/+)* mice were a gift from N. Ono (University of Michigan, Ann Arbor, Michigan) 34. Cathepsin K-cre (*Ctsk-cre*) mice were a gift from S. Kato (University of Tokyo, Tokyo, Japan) and T. Nakamura (Tokyo Dental College) 35. *mTmG* (Stock 007676) 36, *UBC-GFP* (stock 004353) 37, *MIP-GFP* (stock 006864) 38, *LepR-cre* (stock 008320) 39, *Fabp4-cre* (stock 005069) 40, *PDGFRα-cre* (stock 013148) 41,42, and *PolGD257A* (stock 017341) 43 mice were purchased from Jackson Laboratories. Recipient heterozygous *MIP-GFP* mice were generated by breeding homozygous *MIP-GFP* males with wildtype C57Bl6/J females. Experimental *A-Zip* and *A-Zip/MIP-GFP* mice were generated by breeding *A-Zip* males with wildtype C57Bl6/J females or homozygous *MIP-GFP* females respectively. Experimental *PolGD257A/D257A* mice were generated by crossing male *PolGD257A/+* with female *PolGD257A/+* mice. All mice were maintained on a C57Bl6/J background throughout the study. All animals were maintained in accordance with the NIH Guide for the Care and Use of Laboratory Animals and were handled according to protocols approved by the Weill Cornell Medical College subcommittee on animal care (IACUC).

**Surgical procedures:**

All surgical procedures were performed under isoflurane (1-4%) anesthesia. Surgical sites were sterilized using a betadine/iodide/isopropanol preparation after hair removal by a clipper with a #40 blade or a depilatory cream (Nair). After surgery, the visceral lining or muscle was sutured with absorbable Ethicon vicryl sutures (Cen-Med, cat no J386H) prior to closing the skin with wound clips that were removed 2 weeks post-operatively. Animals received intraperitoneal Buprenex (0.5 mg/kg) and oral Meloxicam (2.0 mg/kg) as analgesia prior to surgery and every 24 hours post-surgery for 3 days in total. Host recipients were syngeneic with donors. To avoid potential immunogenicity of labeled cells, all transplantation studies used *MIP-GFP* or *mTmG* recipients that have baseline immunologic tolerance to GFP variants. All surgical procedures were approved by the institutional animal care and use committee at Weill Cornell Medical College.

**High fat diet exposure model:**

3-month-old *mTmG* mice micewere fed with high fat diet (HFD, 60% fat; Research Diets 12492i) or a matched control low fat diet (LFD, 10% fat; Research Diets 12450J) for up to 3 months. Animals were left undisturbed and cages were changed once a week. Fresh food and water were provided each time during cage changes, and body weight was regularly monitored. Animals were euthanized by CO2 narcosis and femur samples were harvested at 4 and 10 weeks after diet exposure. Skeletal cells were isolated for FACS analysis as described below. Additionally, 3-month-old *MIP-GFP* male mice underwent cell implantation into the kidney capsule one week after exposure to LFD or HFD. A 5 µl matrigel plug containing the cells of interest was inserted underneath the capsule. Animals were regularly fed with LFD or HFD up to 12 weeks after surgery. Mice were then euthanized by CO2 and both kidney and femur samples of the recipient mice were collected, fixed and processed as described below.

**Kidney capsule transplantation:**

Kidney capsule transplantation was performed in 8-12 week old *MIP-GFP* male mice as previously described 44. A 1 cm incision was made left of the dorsal midline through the skin and visceral lining. After the kidney was exposed, a 2 mm incision was made in the capsule and a 5 µl matrigel plug (Corning, cat no 356231) containing the cells of interest was inserted underneath the capsule. Approximately 15-20 donor mice were sacrificed to harvest the desired number of SSCs (skeletal stem cells) for every organoid based transplantation experiment. The incision in the capsule was sealed using an electrocautery probe prior to reducing the kidney back into its native location. The skin incision was then closed with absorbable sutures and surgical staples. Animals were euthanized by CO2 narcosis 12-16 weeks after surgery. Post euthanasia, kidney transplants were harvested, fixed with 4% PFA for 4 hours, and washed 3 times with PBS. Bone formation within the kidney graft was detected by micro-CT. Samples were subjected to infiltration, embedding and sectioning as described below. Hematoxylin & Eosin (H&E), Von Kossa staining, immunohistochemistry and LipidTox staining were performed to detect bone and adipose tissue generation within the graft.

**Ovariectomy:**

Ovariectomy was performed in 3-month-old *mTmG* female mice following standard procedures45. In brief, a 1 cm incision was made left or right of the dorsal midline through the skin and visceral lining. The ovary and attached fat were exposed and an electrocautery probe was used to detach the ovary from the fallopian tube. After dissecting out the ovary, incisions were closed with absorbable sutures and surgical staples. The same procedure was then performed on the other side of the dorsal midline to remove the contralateral ovary. Femur samples were harvested from overiectomized mice at 2, 4, 6 and 9 weeks after surgery, and skeletal cells were isolated for FACS analysis. A subset of *MIP-GFP* overiectomized female mice underwent kidney capsule transplantation two weeks post ovariectomy where a 5 µl matrigel plug containing the cells of interest was inserted underneath the kidney capsule. Animals were euthanized by CO2 narcosis 12 weeks after surgery and both kidney and femur samples of the recipient mice were harvested, fixed and processed as described. In a separate experiment, different subsets of skeletal stem cells were isolated by FACS from femurs of mice 9 weeks post ovariectomy and then transplanted into the kidney capsule of 8-10-week-old *MIP-GFP* male host mice. Kidney samples were harvested 12 weeks after surgery, fixed and processed as described.

**Femur fracture:**

Femur fractures were performed as previously described 44. The femur and patella of the right anterolateral femur were exposed, and a single cut was made in the mid-diaphysis of the femur using a Dremel saw with a diamond thin cutting wheel (VWR, cat no 100230-724). A blunt 25-gauge needle was then inserted into the marrow space of the femur across the osteotomy site to stabilize the fracture. This needle was trimmed so that it would not project into stifle joint. Muscle was then placed over the injury site and stitched with absorbable sutures prior to closing the skin with wound clips. We performed femur fracture in 6 weeks old *Ctsk-cre; mTmG* mice. Mice were euthanized by CO2 at the indicated time points post fracture.

**Mammary fat pad transplantation and A-Zip adipose reconstitution:**

Mammary fat pad transplantation was performed as previously described 44. A 1.5 cm longitudinal incision was made in 3-4 week old *mTmG* or *MIP-GFP* females at the midline from just below the sternum to just above the pelvic region, and a second 0.5 cm incision was made from the bottom of the midline incision towards the hip joint of the right hindlimb. After exposing the inguinal mammary gland, a 2 mm pocket was created in the mammary fat pad just below the lymph node, and a 5μl matrigel plug containing the cells of interest was implanted into this pocket. This pocket was sealed by clamping the edges of the fatpad incision together with toothed forceps. Wound clips were used to close the skin incisions. Transplantation for reconstitution of adipose tissue in 8-10 week old *A-Zip/MIP-GFP* mice was performed following the same procedure except that the matrigel plug was placed subcutaneously under the residual parametrial adipose pad in the location of the inguinal mammary gland in both male and female mice 46. Mice were sacrificed 12-20 weeks after transplantation, and reconstitution of adipose tissue was assayed. Serum was collected, and levels of insulin C-peptide (ALPCO) and Adiponectin (R and D Systems) were determined by ELISA following the manufacturer’s instructions.

For FACS analysis during serial transplantation studies, animals were euthanized by CO2 narcosis 2-3-weeks post-surgery, and the mammary fat pad was extracted. The graft tissue was thoroughly minced with razor blades and digested at 37oC in digestion buffer (Collagenase P (1 mg/ml Roche; cat 11213857001) + Dispase II (2 mg/ml; Roche, cat 04942078001) in MEM media (Gibco, cat no A1049001) supplied with 2% serum for 30 mins. Media was added and tubes were centrifuged for 10 mins at 1,500 rpm. The supernatant was carefully removed without disturbing the cellular pellet. DNase I solution was added for 5 mins to the pellet, and the reaction was terminated by adding media containing 2% serum. Tubes were again spun for 10 mins and the resulting pellet was prepared for FACS analysis as described below.

**Intrafemoral transplantation:**

Intrafemoral transplantation was done as previously described with modifications 47,48. 10-12 week old *A-Zip/MIP-GFP* male or female mice were first lethally irradiated with 900 Gy using a Rad Source Technologies RS 2000 Biological Research X-ray Irradiator. 24 hours post irradiation mice received 5 x 106 whole bone marrow cells from syngeneic *MIP-GFP* mice by retro-orbital injection prior to intrafemoral implantation of the cells of interest. After induction of isoflurane anesthesia and surgical site sterilization, an incision was made above the right anterolateral femur and the patellar groove was exposed. A 25-gauge needle was inserted parallel with the long axis of the femur through the patellar groove to create a cavity in the femoral marrow. A 100 microliter Hamilton syringe with a 26-gauge needle was then inserted into the femur to inject 10 µL of the skeletal cell of interest resuspended in serum free MEM (Gibco, cat no A1049001) media. After injection, the patella was reduced prior to closing the skin with wound clips. Mice were euthanized 12 weeks after surgery and serum was collected to determine C-peptide and adipokine levels. Femurs were also collected, fixed with 4% PFA at 4°C for 4-6 hours, washed with PBS and decalcified with 0.5M EDTA for 1-5 days. Samples were subjected to infiltration, embedding and sectioning as described below. GFP fluorescence was visualized to detect successful engraftment and location of the transplanted populations. Successful engraftment of SSCs into the host bone was achieved despite injecting very low numbers (5,000-50,000 cells per population of interest) of highly purified SSC subsets. Concurrent immunofluorescence staining for additional markers was performed as indicated to determine the differentiation state and local milieu of the engrafted populations.

**Isolation of mesenchymal cells:**

Detailed description for isolation of mesenchymal cells can be obtained from published work 49. Briefly, skeletal tissue from young mice (postnatal day 7, 15 or 32) was subjected to both mechanical and enzymatic digestion. The harvested tissue was minced using razor blades and digested for up to 1 hour in digestion buffer containing Collagenase P (1mg/ml; Roche, cat 11213857001) + Dispase II (2mg/ml; Roche, cat 04942078001) in MEM media (Gibco, cat no A1049001) with 2% serum at 37oC with agitation. Harvested femurs from 3-6-month-old mice were initially crushed using a mortar and pestle, minced thoroughly with razor blades and then subjected to enzymatic digestion as described above. The digested tissue was suspended in MEM media (Gibco, cat no A1049001) containing 2% serum and the tubes were centrifuged at 1,500 rpm for 10 mins to pellet the liberated cells. The supernatant was removed, and the pellet was resuspended in 1-2 ml of DNase I (2 units/ml) solution and briefly incubated for 5 mins at 37oC. MEM media (Gibco) containing 2% serum was added to the tube, and the digested tissue was resuspended thoroughly by pipetting. The resuspended cell pellet was then filtered thorough 70-micron nylon mesh, and the tubes were centrifuged at 1,500 rpm for 10 mins. The resulting cell pellet was then subjected to FACS.

**Florescence-activated cell sorting (FACS):**Cells were prepared for FACS following a previously published protocol 44,49. Briefly, cells were washed twice with ice cold FACS buffer (2% FBS + 1mM EDTA in PBS) and incubated with blocking buffer (1:100 dilution; BD bioscience, 553142 for mouse) for 15 mins at 4oC. All primary antibody dilutions were initially prepared in brilliant stain buffer (BD bioscience 563794). Cells were incubated with primary antibody cocktail on ice for 1 hour in the dark. Cells were washed 2 to 3 times with FACS buffer and incubated with secondary antibody solution for 20 minutes. Cells were then washed twice and re-suspended in FACS buffer with DAPI (4-6, Diamidino-2-Phenylindole; 1µg/ml; Invitrogen D1306). FACS was performed using a Becton-Dickinson Aria II equipped with 5 lasers (BD bioscience). Initial compensation was set up using Ultracomp beads (eBioscience 01-1111). Fluorescence minus one (FMO) controls were used for additional compensation and to assess background levels for each stain. Gates were drawn as determined by internal FMO controls to separate positive and negative populations for each cell surface marker. Typically, 5 to 10 million events were recorded for each FACS analysis, and the data was analyzed using FlowJo (version 10.1). Calculations were made in Excel and bar graphs were generated in GraphPad Prism. To better depict the FACS gating strategy, color-coded boxes were drawn to illustrate parent/daughter gates.

**FACS antibodies:**

FACS antibodies for mouse samples include CD45 (clone 30-F11, BD bioscience), CD31 (clone MEC13.3, BD bioscience), Ter119 (clone Ter119, BD bioscience), CD90.2 (clone 53-2.1, BD bioscience), BP-1 (clone 6C3, eBioscience), CD200 (clone OX-90, BD bioscience), CD105 (clone MJ7/18, Biolegend), CD24 (clone M1/69, BD bioscience), CD29 (clone HMβ1-1, Biolegend), CD36 (clone CRF D-2712, BD bioscience), CD146 (clone ME-9F1, BD bioscience), CD140α (clone APA5, Biolegend), LeptinR (R&D system), Streptavidin eFluor 710 (eBioscence), Streptavidin BUV737 (BD bioscience).

**Sample preparation for cryo-sectioning:**Mouse bone samples were extracted and fixed with 4% Paraformaldehyde (PFA) for 4-6 hours at 4°C. Samples were washed three times with PBS and decalcified with 0.5M EDTA for 1-5 days depending on the size and the age of the mice from which the specimens were harvested. Samples were incubated with infiltration solution (20% sucrose + 2% PVP in PBS) in rocking conditions until they sank to the bottom of the tube. Embedding was performed with OCT + 15% sucrose, and samples were preserved at -80oC. 10-20 µm thick sections were cut using a Leica cryostat.

**Immunohistochemistry (IHC):**Frozen samples were thawed at room temperature (RT). Tissue sections were circumscribed with an ImmEdge pen (Vector, cat no H-4000) and allowed to dry. Samples were then rehydrated with PBS, permeabilized with PBS + 0.3% Triton X-100 for 15mins and blocked for 1 hour with 5% donkey serum + 0.3% Triton X-100 in PBS (blocking buffer). Dilutions of primary antibodies were freshly prepared in blocking buffer. Samples were incubated overnight with primary antibodies at 4°C, then washed three times with PBS. Secondary antibodies (1:2000 dilution in blocking buffer) were added to the sample for 1-2 hours, followed by washing three times with PBS. DAPI (300 nM) was added for 5-10 mins and the samples were mounted with antifade mounting solution (Life technologies, cat no P36970). Imaging was performed with a Zeiss LSM 880 confocal microscope with an Airyscan high resolution detector.

**Neutral lipid staining:**

Cryopreserved PFA fixed tissue specimens were allowed to come to room temperature. Samples were briefly rehydrated with PBS. LipidTox neutral lipid stain was prepared at a 1:200 dilution in PBS + 0.3% Digitonin and added to tissue samples for 30 mins at room temperature. Samples were washed with PBS, mounted and subsequently imaged. We used HCS LipidTox deep red neutral lipid stain (Invitrogen, H34477) and HCS LipidTox green neutral lipid stain (Invitrogen, H34475).

**Primary antibodies for IHC:**Primary antibodies used include antibodies recognizing Nestin (Abcam, ab11306, 1:200 dilution), Perilipin 1 (Abcam, ab3526, 1:100 dilution), CD24 (Abcam, ab64064 , 1:100 dilution), Runx2 (Abcam, ab76956, 1:200 dilution), Alpl (Abcam, ab108337, 1:100 dilution), PPARγ (Abcam, ab59256, 1:100 dilution), Cxcl12 (Abcam, ab25117, 1:100 dilution), FABP4 (Abcam, ab92501, 1:50 dilution) and Endomucin (Abcam, ab 106100, 1:100 dilution).

**Hyperion staining:**

15-day old mouse femurs were fixed in 4% PFA and samples were cryopreserved as described above. Freshly cut 5μm sections were mounted onto charged slides and Hyperion staining was conducted within 24 hours. Antibody clones were initially validated through separate immunofluorescence staining. For each antibody, 100μg of purified antibody in a BSA and azide free format was heavy metal conjugated using the MaxPar X8 multimetal labeling kit (Fluidigm) according to the manufacturer’s protocol. Antibodies were conjugated with suitable heavy metals depending on the abundance of their target in bone tissue. Freshly cut 5μm sections of femur samples were permeabilized with PBS + 0.3% Triton X-100 for 15mins and blocked for 1-2 hours with 5% donkey serum + 0.3% Triton X-100 in PBS (blocking buffer). All heavy metal conjugated antibodies were freshly prepared in the blocking buffer and samples were incubated overnight with the antibody cocktail at 4°C. Samples were extensively washed with PBS several times. Cell nuclei were stained with Intercalator-Iridium diluted in PBS for 30 mins at RT. Slides were briefly washed with MilliQ purified water and air dried prior to ablation.

**Antibody heavy metal conjugation for Hyperion staining:**

The following antibodies were conjugated with heavy metals and used at the specific dilutions to stain the tissue specimen. CD200 (Abcam, ab33734) to 158Gd (1:50 dilution), CD105 (Abcam, ab107595) to 156Gd (1:100 dilution), DDR2 (LSBio, LS-C164363) to 159Tb (1:100 dilution), TRAP (Abcam, ab240970 to 167Er (1:50 dilution), Collagen 1 (Abcam, ab34710) to 141Pr (1:100 dilution), CD24 (Abcam, ab64064) to 172Yb (1:25 dilution), CD29 (Abcam, ab221776) to 163Dy (1:25 dilution), Galectin1 (Abcam, ab225540) to 166Er (1:100 dilution), Perilipin 1 (Abcam, ab3526) to 161Dy (1:100 dilution), CD146 (Abcam, ab210072) to 175Lu (1:50 dilution), CD140α (Abcam, ab234965) to 165Ho (1:50 dilution), Nestin (Abcam, ab134017) to 171Yb (1:50 dilution), and Cxcl12 (Abcam, ab25117) 153Eu (1:50 dilution).

**Imaging mass cytometry and data processing:**

The stained slides were ablated on Hyperion Imaging System (Fluidigm). This instrument was calibrated using a tuning slide to optimize the sensitivity of detection range. The region of interest (ROI) to ablate was chosen. The ROI was scanned at 200 Hz and ablation energy of the laser was tested to ensure that the specified tissue sections were successfully ablated without significant etching of the glass slide. The final raw data was output in the .MCD file format which contained all the metadata, the raw intensities for each laser pulse (1 micron resolution) and .TXT files. Specificity of the antibodies post conjugation was validated by observing the expected staining pattern with good signal-to-noise ratio for each channel. The .MCD file was uploaded to MCD Viewer (Fluidigm) to view the images. TIFF files for every individual channel were exported for image generation using the Fiji Image J software. Data in TIFF format were segmented into single cells using a Cell Profiler (version 3.0.0) pipeline. Cell masking was performed where the cell nuclei and cell cytoplasm were identified. The masked data was processed using histoCAT (version 1.73) for further downstream analysis. **Hyperion data analysis:**

Spectral plots were generated, and cells were segregated into positive and negative populations for each marker based on its expression using FlowJo (version 10.1) software (Fig 4n, Extended Data Fig 4r). The analyzed data was exported in CSV format and the files were merged with the mother file where each cell was annotated based on marker expression. We broadly assigned cells into 10 discrete populations (P1 to P10, Fig 4w) and the remaining cells were identified as “Other” and labelled as a P11 cell type. To determine which cell types were physically adjacent to CD24+CD29+SSCs (P1), we extracted the top 10 nearest neighboring cells for each P1 cell based on the Euclidean distance. Two-sided Fisher’s exact test was used to compare the occurrence of P1-P11 cells as neighbors to P1 cells. The fraction of positive and negative cells for each marker was calculated for ‘Other’ (P11) cells (Extended Data Fig 4s-v).

**Bulk RNA sequencing:**

3-month-old mice were fed with high fat diet (HFD, 60% fat) or a matched control low fat diet (LFD,10% fat) for 4 weeks. Mice were sacrificed using CO2 andCD24+CD29+SSCs were isolated by FACS for bulk RNA sequencing. cDNA libraries were generated using SMART-Seq v4 Ultra low input RNA plus Nextera XT DNA sample preparation kit, and sequenced on an Illumina NovaSeq6000 sequencer with paired-end 50 bps. The sequenced reads were cleaned by trimming adapter sequences and low-quality bases using cutadapt (version 1.9.1) and were aligned to the mouse reference genome (GRCm38) using STAR (version 2.5.2b) 50. Raw read counts per gene were extracted using HTSeq-count (version 0.11.2) 51. Differential expression analysis was performed using DESeq2 (version 1.22.2) 52. Heatmap plots were generated using the R pheatmap package.

**PolG Bulk ATAC-Seq data:**

Different skeletal cell types were isolated by FACS from 3-month old *PolGD257A/D257A* femurs. Sorted cells were centrifuged at 800 x g for 10 mins, the pellet was suspended in 200 µl of PBS and transferred to V-bottom 96-well-plate. Cells were spun down, lysed and tagmented with 50 µL of reaction buffer (50% 2X TD buffer, 30% PBS, 0.1% NP40, 0.5µl Tn5 enzyme) 53 (Illumina Tag DNA Enzyme & Buffer Small Kit, 20034197). The plate was incubated at 37°C by gently shaking at 220 rpm in a shaker for 30 min. The tagmented DNA samples were purified using the MinElute PCR kit (Qiagen, cat no 28004) and eluted with 20 µl of ddH2O. ATAC-Seq libraries were prepared and samples were sequenced on an Illumina NovaSeq6000 sequencer with paired-end 100 bps.

The sequencing reads were cleaned by trimming adapter sequences using cutadapt (version 2.10), and were aligned to the mouse reference genome (GRCm38) using BWA (Burrows-Wheeler Aligner) (version 0.7.17). To improve alignment for the mitochondrial genome, nuclear genome regions that were homologous to the mitochondrial genome were hard-masked, following previously published work 54. Mitochondrial DNA mutations were tracked among the various skeletal cell subsets by following previously published work 53. In particular, A, C, G, T bases at each position across the mitochondrial genome were counted and calculated for all possible mutations. High-confidence mutations were then extracted and hierarchical clustering was performed. All relevant codes for the data analysis will be made available upon request. For nuclear DNA portion, open chromatin regions were identified and differential ATAC-Seq analysis was performed using published code (<https://rockefelleruniversity.github.io/favicon.ico>).

**Micro-CT and Paraffin embedding:**Micro computed tomography (µCT) was conducted according to previously described parameters 55 on a Scanco Medical Micro-CT35 system at the Citigroup Biomedical Imaging Core. µCT operators and evaluators were blinded to the experimental groups under analysis. Kidney samples were fixed with 4% PFA at 4oC for 4-6 hours, washed three times with PBS and scanned to detect presence of bone organoids. Kidney samples were then cryopreserved as described above. Mouse femurs were fixed overnight with 4% PFA at 4oC, and non-decalcified specimens were scanned. Femur samples were then decalcified with 0.5M EDTA for 5-6 days and then subjected to paraffin embedding. The Translational Research Pathology Core at Weill Cornell performed paraffin embedding, sectioning and H & E staining following a previously published protocol55.

**Statistical analyses:**All data are shown as the mean ± standard deviation (S.D.) or standard error of the mean (S.E.M.) as indicated. Where applicable, we first performed the Shapiro-Wilk normality test for checking normality. For comparisons between two groups, a two-tailed, unpaired Student’s *t*-test was used. If normality tests failed, Mann-Whitney tests were used. For comparisons of three or more groups, one-way ANOVA was used if normality tests passed, followed by Tukey`s multiple comparison test for all pairs of groups. GraphPad PRISM software (v7.01 La Jolla, CA) was used for statistical analysis. *P* < 0.05 was considered statistically significant.

**Data availability:**RNA-seq and ATAC-seq data have been deposited at the Gene Expression Omnibus and will be made available upon request. All relevant codes for the data analysis will be made available upon request.

**References:**

32 Moitra, J. *et al.* Life without white fat: a transgenic mouse. *Genes & development* **12**, 3168-3181, doi:10.1101/gad.12.20.3168 (1998).

33 Colombo, C. *et al.* Opposite effects of background genotype on muscle and liver insulin sensitivity of lipoatrophic mice. Role of triglyceride clearance. *The Journal of biological chemistry* **278**, 3992-3999, doi:10.1074/jbc.M207665200 (2003).

34 Mizuhashi, K. *et al.* Resting zone of the growth plate houses a unique class of skeletal stem cells. *Nature* **563**, 254-258, doi:10.1038/s41586-018-0662-5 (2018).

35 Nakamura, T. *et al.* Estrogen prevents bone loss via estrogen receptor alpha and induction of Fas ligand in osteoclasts. *Cell* **130**, 811-823, doi:10.1016/j.cell.2007.07.025 (2007).

36 Muzumdar, M. D., Tasic, B., Miyamichi, K., Li, L. & Luo, L. A global double-fluorescent Cre reporter mouse. *Genesis* **45**, 593-605, doi:10.1002/dvg.20335 (2007).

37 Schaefer, B. C., Schaefer, M. L., Kappler, J. W., Marrack, P. & Kedl, R. M. Observation of antigen-dependent CD8+ T-cell/ dendritic cell interactions in vivo. *Cellular immunology* **214**, 110-122, doi:10.1006/cimm.2001.1895 (2001).

38 Hara, M. *et al.* Transgenic mice with green fluorescent protein-labeled pancreatic beta -cells. *American journal of physiology. Endocrinology and metabolism* **284**, E177-183, doi:10.1152/ajpendo.00321.2002 (2003).

39 DeFalco, J. *et al.* Virus-assisted mapping of neural inputs to a feeding center in the hypothalamus. *Science* **291**, 2608-2613, doi:10.1126/science.1056602 (2001).

40 He, W. *et al.* Adipose-specific peroxisome proliferator-activated receptor gamma knockout causes insulin resistance in fat and liver but not in muscle. *Proceedings of the National Academy of Sciences of the United States of America* **100**, 15712-15717, doi:10.1073/pnas.2536828100 (2003).

41 Roesch, K. *et al.* The transcriptome of retinal Muller glial cells. *The Journal of comparative neurology* **509**, 225-238, doi:10.1002/cne.21730 (2008).

42 Jeffery, E. *et al.* Characterization of Cre recombinase models for the study of adipose tissue. *Adipocyte* **3**, 206-211, doi:10.4161/adip.29674 (2014).

43 Kujoth, G. C. *et al.* Mitochondrial DNA mutations, oxidative stress, and apoptosis in mammalian aging. *Science* **309**, 481-484, doi:10.1126/science.1112125 (2005).

44 Debnath, S. *et al.* Discovery of a periosteal stem cell mediating intramembranous bone formation. *Nature* **562**, 133-139, doi:10.1038/s41586-018-0554-8 (2018).

45 Xu, R. *et al.* Targeting skeletal endothelium to ameliorate bone loss. *Nature medicine* **24**, 823-833, doi:10.1038/s41591-018-0020-z (2018).

46 Rodeheffer, M. S., Birsoy, K. & Friedman, J. M. Identification of white adipocyte progenitor cells in vivo. *Cell* **135**, 240-249, doi:10.1016/j.cell.2008.09.036 (2008).

47 Pauley, P. *et al.* Local transplantation is an effective method for cell delivery in the osteogenesis imperfecta murine model. *International orthopaedics* **38**, 1955-1962, doi:10.1007/s00264-013-2249-y (2014).

48 Zhou, B. O., Yue, R., Murphy, M. M., Peyer, J. G. & Morrison, S. J. Leptin-receptor-expressing mesenchymal stromal cells represent the main source of bone formed by adult bone marrow. *Cell stem cell* **15**, 154-168, doi:10.1016/j.stem.2014.06.008 (2014).

49 Debnath, S. & Greenblatt, M. B. Specimen Preparation for Single-Cell Sequencing Analysis of Skeletal Cells. *Methods in molecular biology* **2221**, 89-100, doi:10.1007/978-1-0716-0989-7_7 (2021).

50 Dobin, A. *et al.* STAR: ultrafast universal RNA-seq aligner. *Bioinformatics* **29**, 15-21, doi:10.1093/bioinformatics/bts635 (2013).

51 Anders, S., Pyl, P. T. & Huber, W. HTSeq--a Python framework to work with high-throughput sequencing data. *Bioinformatics* **31**, 166-169, doi:10.1093/bioinformatics/btu638 (2015).

52 Love, M. I., Huber, W. & Anders, S. Moderated estimation of fold change and dispersion for RNA-seq data with DESeq2. *Genome biology* **15**, 550, doi:10.1186/s13059-014-0550-8 (2014).

53 Ludwig, L. S. *et al.* Lineage Tracing in Humans Enabled by Mitochondrial Mutations and Single-Cell Genomics. *Cell* **176**, 1325-1339 e1322, doi:10.1016/j.cell.2019.01.022 (2019).

54 Lareau, C. A. *et al.* Massively parallel single-cell mitochondrial DNA genotyping and chromatin profiling. *Nature biotechnology*, doi:10.1038/s41587-020-0645-6 (2020).

55 Greenblatt, M. B. *et al.* CHMP5 controls bone turnover rates by dampening NF-kappaB activity in osteoclasts. *The Journal of experimental medicine* **212**, 1283-1301, doi:10.1084/jem.20150407 (2015).
